# Supplementary material for: Self-assembly of dual drug-delivery coating for synergistic bone regeneration
Source: Royal Society of Chemistry journal article supplement (doi:10.1039/c6tb01262k), 2016-01-01
Supplement: c6tb01262k1.pdf [file c6tb01262k1.pdf]

## Supporting Information (SI)

### **Self-assembly of dual drug-deliver coating for synergistic bone regeneration**

Xue Qu,\* Fan He, Haoqi Tan, Yuanman Yu, Akbar. Axrap, Meng Wang, Kai Dai, Zheng Zhang, Fei Yang, Shenguo Wang, Joachim Kohn and Changsheng Liu\*

Table S1 The parameters of primers utilized for detecting osteogenic gene expression.

| Gene        | Direction | Sequence(5'-3')                |
|-------------|-----------|--------------------------------|
| ALP         | Forward   | CCA ACT CTT TTG TGC CAG AGA    |
|             | Reverse   | GGC TAC ATT GGT GTT GAG CTT TT |
| Collagen I  | Forward   | GGT ATG CTT GAT CTG TAT CTG C  |
|             | Reverse   | AGT CCA GTT CTT CAT TGC ATT    |
| Osteocalcin | Forward   | CTG ACA AAG CCT TCA TGT CCA A  |
|             | Reverse   | GCG GGC GAG TCT GTT CAC TA     |
| Runx2       | Forward   | CGG CCC TCC CTG AAC TCT        |
|             | Reverse   | TGC CTG CCT GGG ATC TGT        |
| GAPDH       | Forward   | GTC GTG GAG TCT ACT GGT GTC    |
|             | Reverse   | GAG CCC TTC CAC AAT GCC AAA    |

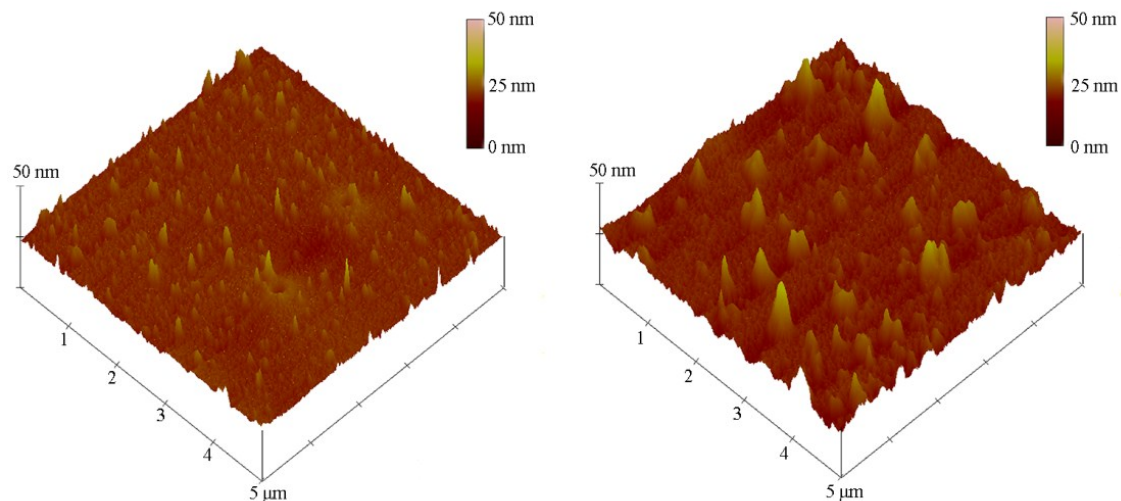

Fig. S1 AFM images of PLGA film (left) and PEI-aminolysed PLGA film (i.e. bare substrate, right)

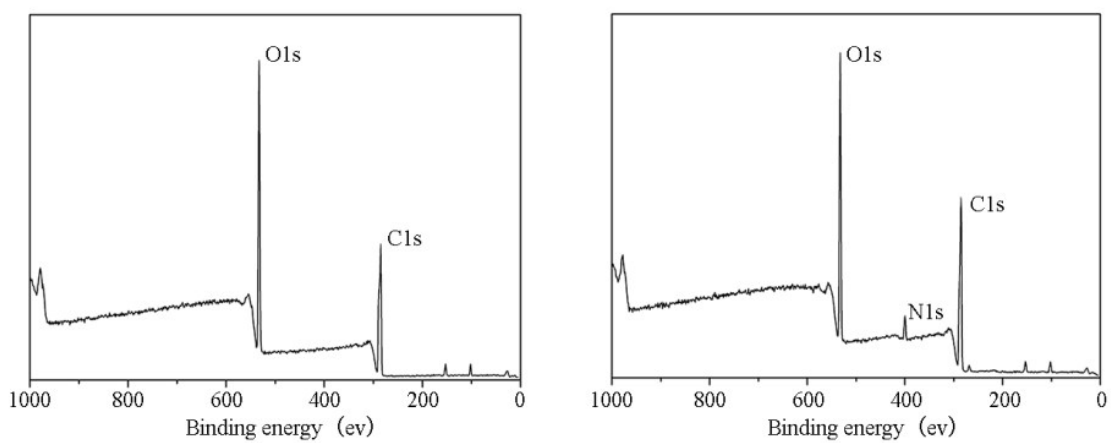

Fig. S2 XPS spectra PLGA film (left) and PEI-aminolysed PLGA film (i.e. bare substrate, right).

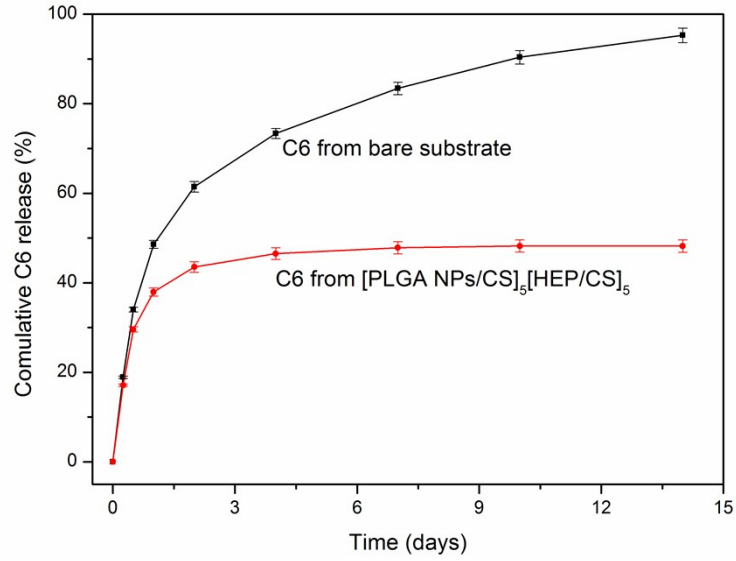

Fig. S3 Release profiles of C6 in PBS with 0.5% tween-80 from bare substrate (i.e. PEI-aminolysed PLGA film) and substrate with [PLGA NPs/CS]<sub>5</sub>[HEP/CS]<sub>5</sub> coating.

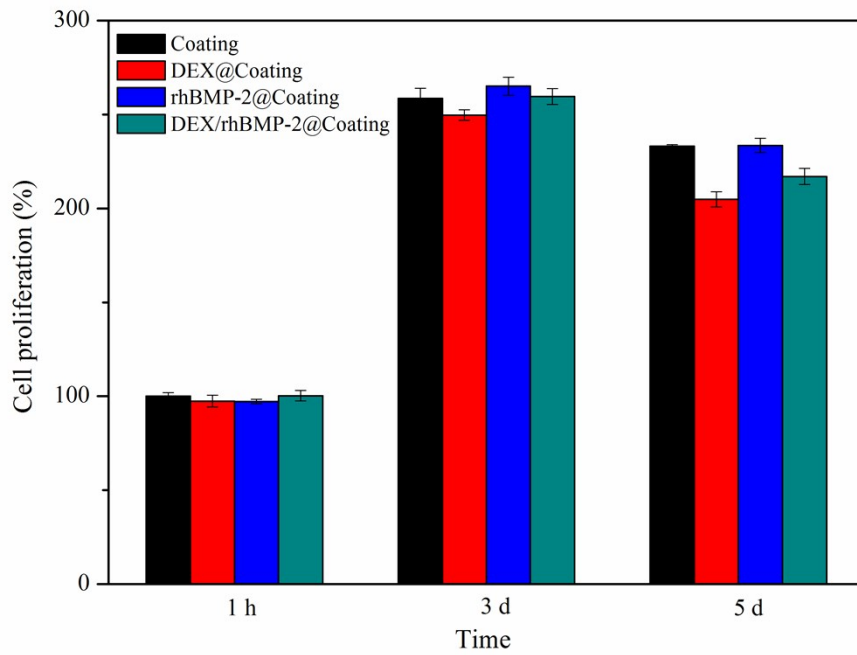

Fig. S4 Cell proliferation of C2C12 cells on different coating after 1 hour, 3 and 5 days incubation determined by CCK-8 assay.

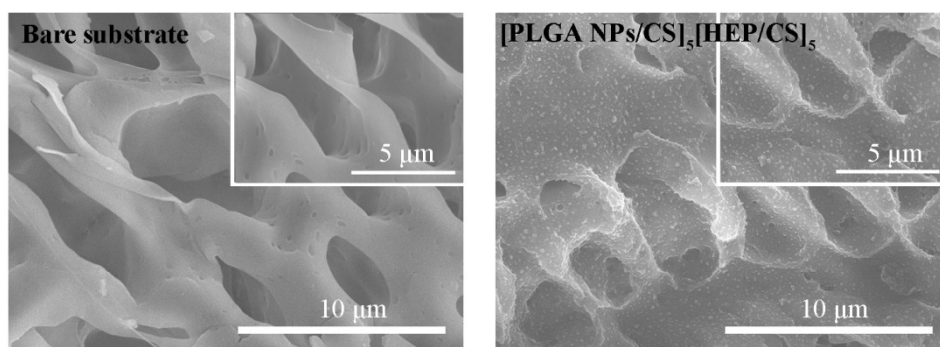

Fig. S5 SEM images of bare substrate (i.e. PEI-aminolysed PLGA scaffold) and substrate modified with [PLGA NPs/CS]<sub>5</sub>[HEP/CS]<sub>5</sub> coating for in vivo study.
